# Supplementary material for: Microalgae-Based Remediation of Real Textile Wastewater: Assessing Pollutant Removal and Biomass Valorisation
Source: MDPI journal article supplement (doi:10.3390/bioengineering11010044), 2024-01-01
Supplement: s1 [file s1]

## Supplementary Material

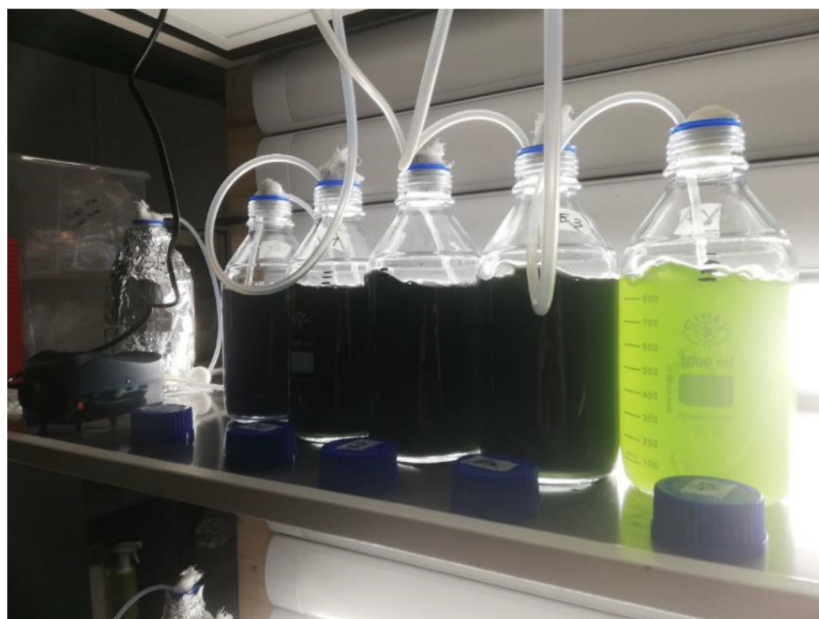

**Figure S1.** Experimental installation used for microalgal growth.

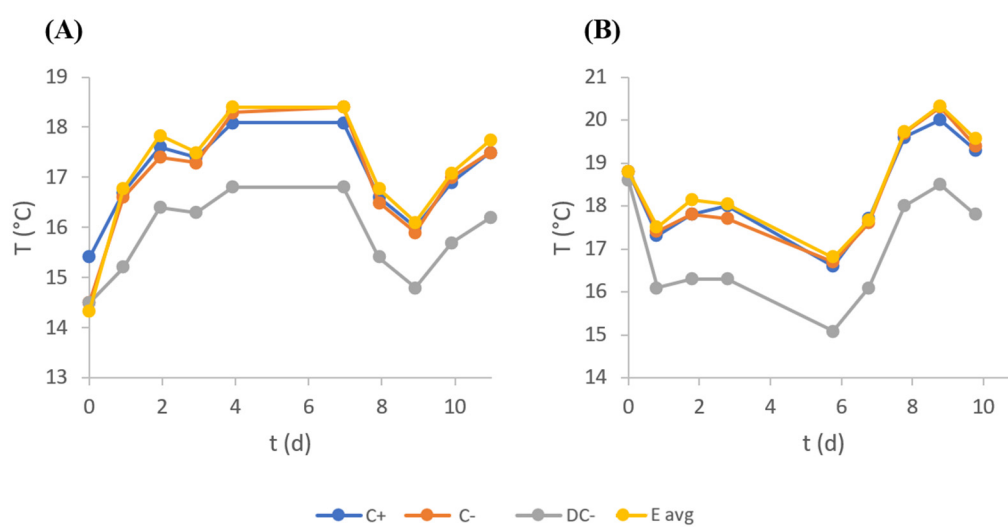

**Figure S2.** Time-course evolution of temperature inside each flask (A and B represent effluent 1 and 2, respectively).

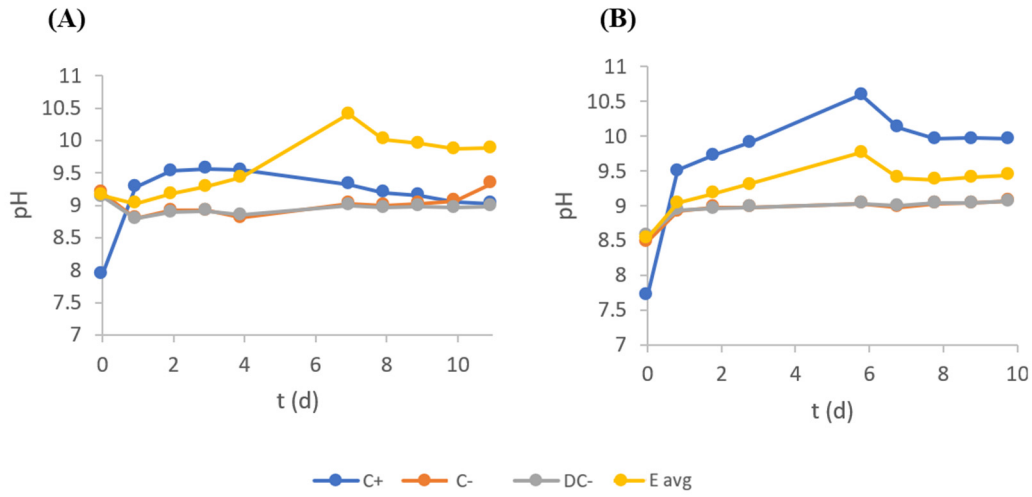

**Figure S3.** Time-course evolution of pH inside each flask (A and B represent effluent 1 and 2, respectively).

**Table S1.** All the calibration curves used throughout this study.

| Calibration Curve                                               | y                           | $a \pm s_a$                                   | $b \pm s_b$                        | $R^2$ | LOD    | LOQ    |
|-----------------------------------------------------------------|-----------------------------|-----------------------------------------------|------------------------------------|-------|--------|--------|
| Biomass concentration ( $\text{mg}_{\text{DW}} \text{L}^{-1}$ ) | $\text{OD}_{680\text{nm}}$  | $2.67 \times 10^{-3} \pm 4.4 \times 10^{-5}$  | $-0.13064 \pm 8.83 \times 10^{-3}$ | 0.999 | 9.917  | 33.058 |
| $\text{NO}_3^-$ ( $\text{mg L}^{-1}$ )                          | $\text{Abs}_{410\text{nm}}$ | $0.0510 \pm 0.0008$                           | $0.0176 \pm 0.0044$                | 0.998 | 0.26   | 0.87   |
| $\text{PO}_4^{3-}$ ( $\text{mg L}^{-1}$ )                       | $\text{Abs}_{820\text{nm}}$ | $0.184 \pm 0.002$                             | $0.004 \pm 0.003$                  | 1.000 | 0.03   | 0.19   |
| Colour                                                          | $\text{Abs}_{400\text{nm}}$ | $9.28 \times 10^{-4} \pm 7.66 \times 10^{-6}$ | $-0.00223 \pm 0.001306$            | 0.999 | 4.222  | 14.075 |
| COD – Low Range ( $\text{mg}_{\text{O}_2} \text{L}^{-1}$ )      | $\text{Abs}_{420\text{nm}}$ | $0.00273 \pm 0.000113$                        | $-0.0160 \pm 0.00587$              | 0.993 | 6.441  | 21.470 |
| COD – High Range ( $\text{mg}_{\text{O}_2} \text{L}^{-1}$ )     | $\text{Abs}_{600\text{nm}}$ | $0.000412 \pm 2.75 \times 10^{-6}$            | $-0.00187 \pm 0.00148$             | 0.998 | 10.803 | 36.011 |

$a$ : slope of the calibration curve;  $\text{Abs}$ : Absorbance;  $b$ : Intercept; COD: Chemical oxygen demand; LOD: Limit of detection; LOQ: Limit of quantification; OD: Optical density;  $R^2$ : Coefficient of determination;  $s_a$ : Standard deviation of the slope;  $s_b$ : Standard deviation of the intercept.

**Table S2.** Chemical characterization of each effluent. Values are presented as mean  $\pm$  standard deviation.

|                                            | Effluent 1      | Effluent 2      |
|--------------------------------------------|-----------------|-----------------|
| [NO <sub>3</sub> -N] (mg L <sup>-1</sup> ) | 0.79 $\pm$ 0.03 | 1.34 $\pm$ 0.07 |
| [NH <sub>4</sub> -N] (mg L <sup>-1</sup> ) | 1.30 $\pm$ 0.04 | 6.8 $\pm$ 0.2   |
| [PO <sub>4</sub> -P] (mg L <sup>-1</sup> ) | 7.2 $\pm$ 0.2   | 3.25 $\pm$ 0.06 |
| COD (mg L <sup>-1</sup> )                  | 60 $\pm$ 1      | 583 $\pm$ 14    |
| Turbidity (NTU)                            | 135 $\pm$ 7     | 100 $\pm$ 0     |
| pH                                         | 9.13            | 8.57            |
| TS (mg L <sup>-1</sup> )                   | 4.19 $\pm$ 0.04 | 5.5 $\pm$ 0.2   |
| TSS (mg L <sup>-1</sup> )                  | 0.18 $\pm$ 0.02 | 0.12 $\pm$ 0.02 |
| Colour (uH)                                | 675 $\pm$ 12    | 956 $\pm$ 18    |
| DOC (mg L <sup>-1</sup> )                  | 135 $\pm$ 7     | 126 $\pm$ 8     |
| TN (mg L <sup>-1</sup> )                   | 11.4 $\pm$ 0.2  | 14.6 $\pm$ 0.7  |

COD: Chemical oxygen demand; DOC: Dissolved organic carbon; NH<sub>4</sub>-N: Ammonium-nitrogen; NO<sub>3</sub>-N: nitrate-nitrogen; PO<sub>4</sub>-P: Phosphate-phosphorus; TN: Total nitrogen; TS: Total solids; TSS: Total suspended solids.

**Table S3.** Kinetic parameters correspondent to the obtained modified Gompertz models.

|                    | Parameter                            | Effluent 1 | Effluent 2 |
|--------------------|--------------------------------------|------------|------------|
| NO <sub>3</sub> -N | S <sub>0</sub> (mg L <sup>-1</sup> ) | 24.05      | 11.10      |
|                    | k (d <sup>-1</sup> )                 | 1.15       | 0.78       |
|                    | $\lambda$ (d)                        | 0.68       | 2.30       |
|                    | R <sup>2</sup>                       | 0.997      | 0.998      |
|                    | RMSE (mg L <sup>-1</sup> )           | 0.631      | 0.292      |
| NH <sub>4</sub> -N | S <sub>0</sub> (mg L <sup>-1</sup> ) | 1.12       | 6.99       |
|                    | k (d <sup>-1</sup> )                 | 8.35       | 2.83       |
|                    | $\lambda$ (d)                        | 0.00005    | 0.00005    |
|                    | R <sup>2</sup>                       | 1.000      | 1.000      |
|                    | RMSE (mg L <sup>-1</sup> )           | 0.001      | 0.030      |
| PO <sub>4</sub> -P | S <sub>0</sub> (mg L <sup>-1</sup> ) | 7.61       | 3.02       |
|                    | k (d <sup>-1</sup> )                 | 0.43       | 2.12       |
|                    | $\lambda$ (d)                        | 0.82       | 0.27       |
|                    | R <sup>2</sup>                       | 0.996      | 1.000      |
|                    | RMSE (mg L <sup>-1</sup> )           | 0.338      | 0.008      |

k: Uptake rate; RE: Removal efficiency; RMSE: Root mean squared error; R<sup>2</sup>: Coefficient of determination; S<sub>0</sub>: Initial nutrient concentration;  $\lambda$ : Lag time.

**Table S4.** Biomass specific yields obtained for C+ and E assays. Values are presented as mean  $\pm$  standard deviation. Within the same column and Y<sub>X/S</sub>, average values sharing the same letter (a, b) are statistically different (p < 0.05).

|                                                                     |    | Effluent 1               | Effluent 2                |
|---------------------------------------------------------------------|----|--------------------------|---------------------------|
| Y <sub>X/S</sub> (N, g <sub>biomass</sub> /g <sub>substrate</sub> ) | C+ | 31 $\pm$ 2 <sup>a</sup>  | 47 $\pm$ 2 <sup>a</sup>   |
|                                                                     | E  | 49 $\pm$ 11 <sup>b</sup> | 45 $\pm$ 4 <sup>a</sup>   |
| Y <sub>X/S</sub> (P, g <sub>biomass</sub> /g <sub>substrate</sub> ) | C+ | 81 $\pm$ 2 <sup>a</sup>  | 140 $\pm$ 4 <sup>a</sup>  |
|                                                                     | E  | 159 $\pm$ 3 <sup>a</sup> | 257 $\pm$ 10 <sup>a</sup> |

Y<sub>X/S</sub>: Biomass specific yield.

**Table S5.** Initial and final COD values obtained for C+, E, C- and DC- assays. Values are presented as mean  $\pm$  standard deviation.

|     | Effluent 1                  |                             | Effluent 2                  |                             |
|-----|-----------------------------|-----------------------------|-----------------------------|-----------------------------|
|     | $t_0$ (mg L <sup>-1</sup> ) | $t_f$ (mg L <sup>-1</sup> ) | $t_0$ (mg L <sup>-1</sup> ) | $t_f$ (mg L <sup>-1</sup> ) |
| C+  | 22 $\pm$ 2                  | 86.7 $\pm$ 0.9              | 42 $\pm$ 13                 | 224 $\pm$ 15                |
| E   | 75 $\pm$ 2                  | 75 $\pm$ 1                  | 458 $\pm$ 30                | 556 $\pm$ 34                |
| C-  | 71 $\pm$ 3                  | 79 $\pm$ 3                  | 456 $\pm$ 18                | 220 $\pm$ 17                |
| DC- | 72 $\pm$ 2                  | 78 $\pm$ 2                  | 497 $\pm$ 6                 | 218 $\pm$ 17                |

$t_x$ : value obtained on the day x.

**Table S6.** Initial and final turbidity values obtained for C+, E, C- and DC- assays. Values are presented as mean  $\pm$  standard deviation.

|     | Effluent 1      |                | Effluent 2    |                |
|-----|-----------------|----------------|---------------|----------------|
|     | $t_0$ (NTU)     | $t_f$ (NTU)    | $t_0$ (NTU)   | $t_f$ (NTU)    |
| C+  | 0.90 $\pm$ 0.07 | 13 $\pm$ 0     | 2.0 $\pm$ 0.4 | 26 $\pm$ 3     |
| E   | 73 $\pm$ 7      | 25 $\pm$ 2     | 47 $\pm$ 4    | 11 $\pm$ 1     |
| C-  | 60 $\pm$ 0      | 19.5 $\pm$ 0.7 | 50 $\pm$ 0    | 11.5 $\pm$ 0.7 |
| DC- | 65 $\pm$ 0      | 19.5 $\pm$ 0.7 | 45 $\pm$ 0    | 13.5 $\pm$ 0.7 |

$t_x$ : value obtained on the day x.

**Table S7.** Initial and final colour values obtained for C+, E, C- and DC- assays.

|     | Effluent 1 |               | Effluent 2 |               |
|-----|------------|---------------|------------|---------------|
|     | $t_0$ (uH) | $t_{11}$ (uH) | $t_0$ (uH) | $t_{10}$ (uH) |
| C+  | 19         | 115           | 23         | 160           |
| E   | 480        | 280           | 600        | 440           |
| C-  | 400        | 230           | 680        | 460           |
| DC- | 420        | 240           | 520        | 440           |

$t_x$ : value obtained on the day x.

**Table S8.** Initial and final pigment content (in mass percentage) in the microalgal biomass for C+ and E assays. Values are presented as mean  $\pm$  standard deviation. Within the same column and for each pigment, average values sharing the same letter (a, b) are statistically different ( $p < 0.05$ ).

|               |            |    | $S_0$ (% m m <sup>-1</sup> )   | $S_f$ (% m m <sup>-1</sup> )   |
|---------------|------------|----|--------------------------------|--------------------------------|
| Chl-a         | Effluent 1 | C+ | 1.49 $\pm$ 0.02 <sup>a</sup>   | 0.346 $\pm$ 0.001 <sup>a</sup> |
|               |            | E  | 0.80 $\pm$ 0.02 <sup>a</sup>   | 0.62 $\pm$ 0.02 <sup>a</sup>   |
|               | Effluent 2 | C+ | 2.29 $\pm$ 0.03 <sup>a</sup>   | 0.87 $\pm$ 0.03 <sup>a</sup>   |
|               |            | E  | 2.4 $\pm$ 0.2 <sup>b</sup>     | 1.15 $\pm$ 0.06 <sup>a</sup>   |
| Chl-b         | Effluent 1 | C+ | 0.67 $\pm$ 0.01 <sup>a</sup>   | 0.19 $\pm$ 0.01 <sup>a</sup>   |
|               |            | E  | 0.41 $\pm$ 0.02 <sup>a</sup>   | 0.34 $\pm$ 0.02 <sup>a</sup>   |
|               | Effluent 2 | C+ | 0.97 $\pm$ 0.01 <sup>a</sup>   | 0.41 $\pm$ 0.04 <sup>a</sup>   |
|               |            | E  | 1.04 $\pm$ 0.06 <sup>b</sup>   | 0.50 $\pm$ 0.01 <sup>a</sup>   |
| Chl-a + Chl-b | Effluent 1 | C+ | 2.17 $\pm$ 0.03 <sup>a</sup>   | 0.53 $\pm$ 0.01 <sup>a</sup>   |
|               |            | E  | 1.211 $\pm$ 0.001 <sup>a</sup> | 0.96 $\pm$ 0.04 <sup>a</sup>   |
|               | Effluent 2 | C+ | 3.25 $\pm$ 0.03 <sup>a</sup>   | 1.28 $\pm$ 0.07 <sup>a</sup>   |
|               |            | E  | 3.4 $\pm$ 0.2 <sup>b</sup>     | 1.66 $\pm$ 0.07 <sup>a</sup>   |
| Carotenoids   | Effluent 1 | C+ | 0.41 $\pm$ 0.01 <sup>a</sup>   | 0.18 $\pm$ 0.01 <sup>a</sup>   |
|               |            | E  | 0.22 $\pm$ 0.01 <sup>a</sup>   | 0.17 $\pm$ 0.01 <sup>b</sup>   |
|               | Effluent 2 | C+ | 0.48 $\pm$ 0.01 <sup>a</sup>   | 0.25 $\pm$ 0.01 <sup>a</sup>   |
|               |            | E  | 0.53 $\pm$ 0.04 <sup>a</sup>   | 0.31 $\pm$ 0.02 <sup>a</sup>   |

$S_0$ : Concentration obtained at day 0;  $S_f$ : Concentration obtained at the last day.

**Table S9.** Experimental results obtained in previous studies for textile wastewater treatment using microalgae.

| Microalgae Species           | Operating Conditions                                                                                                                                                                                                   | Wastewater Characteristics                                                                                                                                                                                                                                                                                               | Results Obtained                                                                                                                                                                                                                                                                                                                                                                 | Ref.       |
|------------------------------|------------------------------------------------------------------------------------------------------------------------------------------------------------------------------------------------------------------------|--------------------------------------------------------------------------------------------------------------------------------------------------------------------------------------------------------------------------------------------------------------------------------------------------------------------------|----------------------------------------------------------------------------------------------------------------------------------------------------------------------------------------------------------------------------------------------------------------------------------------------------------------------------------------------------------------------------------|------------|
| <i>C. vulgaris</i>           | <b>Location:</b> Portugal; <b>No dilution</b> (100 % <sub>WW</sub> ); <b>LI</b> = 214 ± 5 µmol m <sup>-2</sup> s <sup>-1</sup> ; <b>LDR:</b> 24:0; <b>V:</b> 1 L; <b>Time:</b> 11 d                                    | <b>NO<sub>3</sub>-N*</b> : 0.79 ± 0.03 mg L <sup>-1</sup> ; <b>NH<sub>4</sub>-N:</b> 1.30±0.04 mg L <sup>-1</sup> ; <b>PO<sub>4</sub>-P:</b> 3.25±0.06 mg L <sup>-1</sup> ; <b>COD:</b> 60 ± 1 mg L <sup>-1</sup> ; <b>Color:</b> 956 ± 18 uH; <b>TS:</b> 4.19 ± 0.04 mg L <sup>-1</sup> ; <b>Turbidity:</b> 135 ± 7 NTU | <b>µ<sub>max</sub>:</b> 0.290 ± 0.003 d <sup>-1</sup> ; <b>P<sub>max</sub></b> = 176 ± 2 mg L <sup>-1</sup> d <sup>-1</sup> ; <b>X<sub>max</sub>:</b> 1440 ± 47 mg L <sup>-1</sup> ; <b>NO<sub>3</sub>-N RE:</b> 100 ± 0 %; <b>NH<sub>4</sub>-N RE:</b> 95.1 ± 0.4 %; <b>PO<sub>4</sub>-P RE:</b> 99.062 ± 0.005 %; <b>Color RE:</b> 42 %; <b>Valorization product:</b> pigments | This study |
| <i>C. vulgaris</i>           | <b>Location:</b> Egypt; <b>Dilutions</b> (5, 8.5, 17.5, 26.5, 30 % <sub>WW</sub> ); <b>LI</b> = 100 µmol m <sup>-2</sup> s <sup>-1</sup> ; <b>T</b> = 25 ± 1 °C; <b>LDR:</b> 12:12; <b>pH:</b> 8.05; <b>Time:</b> 10 d | <b>COD:</b> 51.2 mg <sub>O2</sub> L <sup>-1</sup> ; <b>TS:</b> 735 mg L <sup>-1</sup> ; <b>TP:</b> 1.51 mg L <sup>-1</sup> ; <b>Heavy Metals:</b> (Cu, Zn, Cr, Mn, Fe) ranging from 6.33 to 380.4 mg L <sup>-1</sup>                                                                                                     | <b>µ<sub>max</sub>:</b> 0.89 d <sup>-1</sup> (8.5 % <sub>WW</sub> ); <b>COD RE<sub>max</sub>:</b> 69.90% (17.5 % <sub>WW</sub> ); <b>Color RE<sub>max</sub>:</b> 76.32% (17.5 % <sub>WW</sub> ); <b>Valorization product:</b> not quantified                                                                                                                                     | [28]       |
| <i>C. vulgaris</i>           | <b>Reactor:</b> Bubble Column; <b>Volume:</b> 1 L; <b>T</b> = 25 ± 2 °C; <b>Dilutions</b> (0, 25, 50, 75 % <sub>WW</sub> ); <b>Time:</b> 12 d; <b>pH:</b> 6.5                                                          | <b>COD:</b> 755 ± 20 mg <sub>O2</sub> L <sup>-1</sup> ; <b>TS:</b> 6267 ± 84 mg L <sup>-1</sup>                                                                                                                                                                                                                          | <b>µ<sub>max</sub>:</b> 0.28 ± 0.07 d <sup>-1</sup> (25 % <sub>WW</sub> ); <b>P<sub>max</sub></b> = 2.91 ± 0.01 g L <sup>-1</sup> d <sup>-1</sup> (25 % <sub>WW</sub> ); <b>COD RE<sub>max</sub>:</b> 82 % (25 % <sub>WW</sub> ); <b>Color RE<sub>max</sub>:</b> 99 ± 0.13 % (25 % <sub>WW</sub> ); <b>Valorization product:</b> biodiesel                                       | [27]       |
| <i>Chlorella</i> sp. KU211b  | <b>Dilutions:</b> (0.5, 1, 2 % <sub>WW</sub> ); <b>LI</b> = 60 µmol m <sup>-2</sup> s <sup>-1</sup> ; <b>Agitation:</b> 110 rpm; <b>V:</b> 250 ml; <b>Time:</b> 2 weeks; <b>pH:</b> 13                                 | <b>COD:</b> 42442 ± 453 mg <sub>O2</sub> L <sup>-1</sup> ; <b>TN:</b> 374 ± 12 mg L <sup>-1</sup> ; <b>TP:</b> 79 ± 4 mg L <sup>-1</sup> ; <b>Turbidity:</b> 2675 ± 89 NTU; <b>Heavy metals:</b> (Al, Cu, Pb, Se, among others)                                                                                          | <b>X<sub>max</sub>:</b> 0.90 g L <sup>-1</sup> (0.5 % <sub>WW</sub> ); <b>Heavy metal RE:</b> 100% (Pb, Se), 45 % (Al), 50% (Cu); <b>Color RE<sub>max</sub>:</b> 71.16% (2 % <sub>WW</sub> ); <b>Valorization product:</b> not quantified                                                                                                                                        | [17]       |
| <i>Chlorella pyrenoidosa</i> | <b>Location:</b> India; <b>Dilution:</b> 75 % <sub>WW</sub> ; <b>V:</b> 500 mL; <b>T:</b> 28 °C; <b>LDR:</b> 24:0; <b>Time:</b> 15 d                                                                                   | <b>pH:</b> 6.8; <b>TS:</b> 5400; <b>BOD:</b> 710 mg <sub>O2</sub> L <sup>-1</sup> ; <b>TP:</b> 4.7; <b>TN:</b> 360                                                                                                                                                                                                       | <b>TN RE:</b> 81 ± 1 %; <b>TP RE:</b> 36 ± 2 %; <b>BOD RE:</b> 73 ± 1.6 %; <b>Valorization product:</b> not quantified                                                                                                                                                                                                                                                           | [29]       |

LDR: Light:dark ratio; LI: Light intensity; COD: Chemical oxygen demand; P: Biomass productivity; RE: Removal efficiency; T: Temperature; TS: Total solids; TP: Total phosphorus; TN: Total nitrogen; V: Volume; X: Biomass concentration; WW: Wastewater; µ: specific growth rate; \* - nutrient was added before microalgal treatment.
